# Supplementary material
Source: Springer Nature journal article supplement (https://www.springermedizin.de/resource/supplementary/12889_2013_6155_MOESM5_ESM.pdf/9497050)

(A)

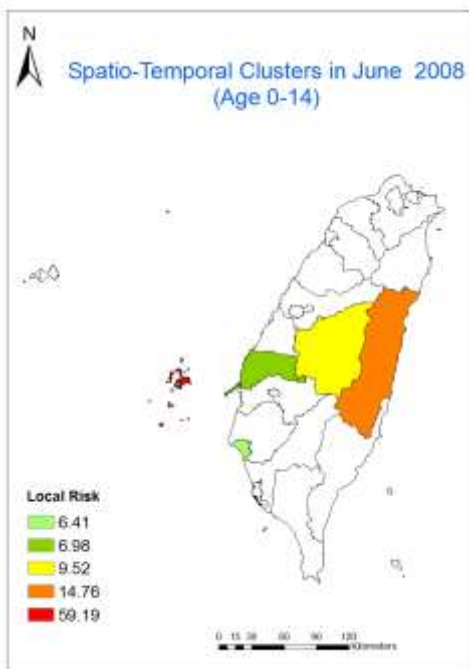

(B)

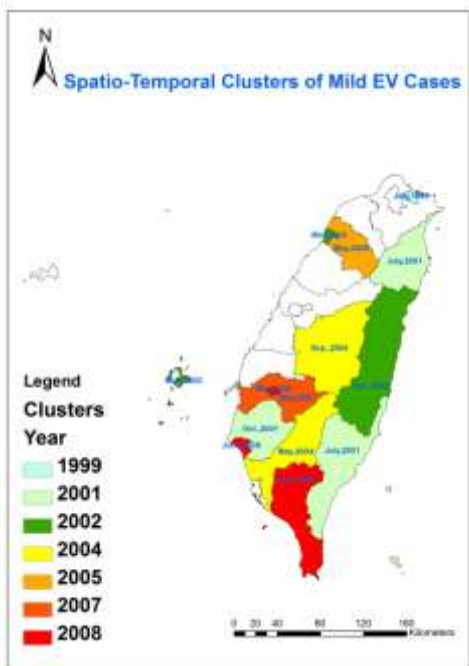

Supplement: MOESM5 [file 9497050]
